# Supplementary material
Source: Elsevier journal article supplement (https://www.sciencedirect.com/science/article/pii/S1699258X21000632)
Supplement: mmc1 [file S1699258X21000632:mmc1.doc]

## ANEXOS

## Anexo 1. Niveles de evidencia y grados de recomendación SIGN

| **Niveles de evidencia** | |
| --- | --- |
| 1++ | Metaanálisis de alta calidad, revisiones sistemáticas de ensayos clínicos o ensayos clínicos de alta calidad con muy poco riesgo de sesgo. |
| 1+ | Metaanálisis bien realizados, revisiones sistemáticas de ensayos clínicos o ensayos clínicos bien realizados con poco riesgo de sesgos. |
| 1- | Metaanálisis, revisiones sistemáticas de ensayos clínicos o ensayos clínicos con alto riesgo de sesgos. |
| 2++ | Revisiones sistemáticas de alta calidad de estudios de cohortes o de casos y controles. Estudios de cohortes o de casos y controles con riesgo muy bajo de sesgo y con alta probabilidad de establecer una relación causal. |
| 2+ | Estudios de cohortes o de casos y controles bien realizados con bajo riesgo de sesgo y con una moderada probabilidad de establecer una relación causal. |
| 2- | Estudios de cohortes o de casos y controles con alto riesgo de sesgo y riesgo significativo de que la relación no sea causal. |
| 3 | Estudios no analíticos, como informes de casos y series de casos. |
| 4 | Opinión de expertos. |
| **Grados de recomendación** | |
| A | Al menos un metaanálisis, revisión sistemática o ensayo clínico clasificado como 1++ y directamente aplicable a la población diana de la guía; o un volumen de evidencia científica compuesto por estudios clasificados como 1+ y con gran concordancia entre ellos. |
| B | Un volumen de evidencia científica compuesta por estudios clasificados como 2++, directamente aplicable a la población diana de la guía y que demuestran gran concordancia entre ellos; o evidencia científica extrapolada desde estudios clasificados como 1 ++ o 1+. |
| C | Un volumen de evidencia científica compuesta por estudios clasificados como 2+ directamente aplicable a la población diana de la guía y que demuestran gran consistencia entre ellos; o evidencia científica extrapolada desde estudios clasificados como 2 ++. |
| D | Evidencia científica de nivel 3 o 4; o evidencia científica extrapolada desde estudios clasificados como 2+. |

*Los estudios clasificados como 1- y 2- no deberían usarse para la elaboración de recomendaciones por su alta posibilidad de sesgo.*

| Buena práctica clínica*** | |
| --- | --- |
| √ | Práctica recomendada basada en la experiencia clínica y el consenso del equipo redactor. |

** En ocasiones el grupo elaborador se percata de algún aspecto práctico importante sobre el que se quiere hacer énfasis y para el cual no existe, probablemente, ninguna evidencia que lo soporte. En general, estos casos tienen que ver con algún aspecto del tratamiento considerado buena práctica clínica y que nadie cuestionaría habitualmente. Estos aspectos son valorados como puntos de buena práctica clínica. Estos mensajes no son una alternativa a las recomendaciones basadas en la evidencia, sino que deben considerarse únicamente cuando no existe otra manera de destacar dicho aspecto.*

## Anexo 2. Niveles de evidencia y grados de recomendación enfoque GRADE-CERQual

**Componentes de la evaluación de la confianza en los estudios47**

| 1. *Limitaciones metodológicas de los estudios incluidos:* el grado de preocupación con respecto a la calidad del diseño o de la realización de los estudios primarios incluidos como evidencia para cada una de las conclusiones de la revisión. |
| --- |
| 2. *Coherencia de los resultados de la revisión:* una evaluación de cómo de clara y convincente es la relación entre los datos de los estudios primarios y una conclusión de la revisión que sintetiza esos datos. Por "convincente", queremos decir que esté bien apoyada. |
| 3. *Adecuación de los datos que contribuyen a una conclusión de la revisión:* la determinación global del grado de riqueza y cantidad de datos que respaldan una conclusión de la revisión. |
| 4. *Relevancia de los estudios incluidos para la pregunta de revisión:* La medida en que el cuerpo de la evidencia proveniente de los estudios primarios que respaldan una conclusión de la revisión es aplicable al contexto (población o perspectiva, fenómeno de interés, entorno) especificado en la pregunta de la revisión. |

| **GRADE: Categorías de las recomendaciones***  **RECOMENDACIÓN FUERTE**  El panel tiene confianza en que los efectos deseables de la adherencia a una recomendación superan los efectos indeseables.  **RECOMENDACIÓN DÉBIL**  El panel concluye quelos efectos deseables de la adherencia a una recomendación probablemente superan los riesgos, pero no están confiados o seguros. | **Se recomienda**  **🡹🡹 🡻🡻**  **Se sugiere**  **🡹 🡻** |
| --- | --- |

**Teniendo en cuenta la fuerza y la dirección, las recomendaciones pueden ser fuertes a favor, fuertes en contra, débiles a favor o débiles en contra de una intervención.*
